# Supplementary material for: Serum SARS-CoV-2 Antigens for the Determination of COVID-19 Severity
Source: MDPI journal article supplement (doi:10.3390/v14081653), 2022-07-28
Supplement: s1 [file s1]

## *Supplementary Material*

**Supplemental Table S1: Demographic data of the included population.** <sup>1</sup> WHO clinical progression scale of 1; <sup>2</sup> WHO clinical progression scale of 2-3; <sup>3</sup> WHO clinical progression scale of 4-5; <sup>4</sup> WHO clinical progression scale of 6-10.

| <b>Demography</b>                           |                   |
|---------------------------------------------|-------------------|
| <b>Participants (n)</b>                     | <b>90</b>         |
| <b>Age (median [min-max])</b>               | <b>77 [20-97]</b> |
| <b>Females (n [%])</b>                      | <b>44 [48.9%]</b> |
| <i>Age (median [min-max])</i>               | <i>78 [20-97]</i> |
| <b>Males (n [%])</b>                        | <b>46 [51.1%]</b> |
| <i>Age (median [min-max])</i>               | <i>77 [33-94]</i> |
| <b>Clinical status</b>                      |                   |
| <b>Asymptomatic (n [%])<sup>1</sup></b>     | <b>11 [12.2%]</b> |
| <b>Symptomatic (n [%])</b>                  | <b>79 [83.3%]</b> |
| <i>Mild disease (n [%])<sup>2</sup></i>     | <i>17 [18.9%]</i> |
| <i>Moderate disease (n [%])<sup>3</sup></i> | <i>47 [52.2%]</i> |
| <i>Severe disease (n [%])<sup>4</sup></i>   | <i>15 [16.7%]</i> |

**Supplemental Table S2:** Description of patients with discordant results between Simoa and iFlash. Red layout corresponds to negative results considering optimized cut-offs (0.099 pg/mL for Simoa and 0.31 COI for iFlash).

| Patient | Gender | Age (years) | Days since symptoms | Disease category | Simoa N antigen (pg/mL) | iFlash N antigen (COI) | Spike IgG (ng/mL) | NP RT-PCR (Ct) |
|---------|--------|-------------|---------------------|------------------|-------------------------|------------------------|-------------------|----------------|
| 1       | Woman  | 84          | 15                  | Moderate         | 2,59                    | 0,37                   | 3038              | 23,9           |
|         |        |             | 16                  |                  | 1,66                    | 0,33                   | 5137              |                |
|         |        |             | 20                  |                  | 0,52                    | 0,22                   | 3479              |                |
|         |        |             | 22                  |                  | 0,099                   | 0,19                   | 3832              |                |
|         |        |             | 26                  |                  | 0,099                   | 0,19                   | 5397              |                |
| 2       | Man    | 81          | 15                  | Moderate         | 2697,86                 | 159,83                 | 13                | 20,1           |
|         |        |             | 16                  |                  | 9317,69                 | 193,92                 | 38                |                |
|         |        |             | 17                  |                  | 1038,9                  | 142,86                 | 60                |                |
|         |        |             | 20                  |                  | 263,87                  | 58,95                  | 1518              |                |
|         |        |             | 21                  |                  | 207,42                  | 42,19                  | 1473              |                |
|         |        |             | 22                  |                  | 70,06                   | 11,44                  | 3490              |                |
|         |        |             | 23                  |                  | 25,8                    | 3,13                   | 7885              |                |
|         |        |             | 24                  |                  | 6,64                    | 0,73                   | 17550             |                |
|         |        |             | 26                  |                  | 0,32                    | 0,18                   | NA                |                |
|         |        |             | 28                  |                  | 0,099                   | 0,16                   | 23014             |                |
|         |        |             | 30                  |                  | 0,099                   | 0,14                   | 27760             |                |
|         |        |             | 35                  |                  | 0,099                   | 0,14                   | 35277             |                |
| 3       | Woman  | 58          | 0                   | Mild             | 0,099                   | 0,33                   | 2455              | 34,5           |
| 4       | Woman  | 74          | 2                   | Moderate         | 6,36                    | 0,94                   | 13805             | 29,2           |
|         |        |             | 3                   |                  | 2,86                    | 0,81                   | 38357             |                |
|         |        |             | 4                   |                  | 2,22                    | 0,57                   | 31711             |                |
|         |        |             | 6                   |                  | 1,32                    | 0,3                    | 36794             |                |
| 5       | Man    | 81          | 2                   | Severe           | 4805,94                 | 370,58                 | 43                | 15,4           |
|         |        |             | 3                   |                  | 4821,62                 | 309,73                 | 30                |                |
|         |        |             | 5                   |                  | 21522,48                | 2087,61                | 25                |                |
|         |        |             | 11                  |                  | 2906,28                 | 368,26                 | 426               |                |
|         |        |             | 15                  |                  | 30,7                    | 3,85                   | 3782              |                |
| 6       | Woman  | 81          | 19                  | Moderate         | 4,62                    | 0,11                   | NA                |                |
|         |        |             | 2                   |                  | 30,88                   | 7,99                   | 50                | 14,7           |
|         |        |             | 3                   |                  | 43,69                   | 3,89                   | 29                |                |
|         |        |             | 4                   |                  | 48,13                   | 4,8                    | 35                |                |
|         |        |             | 7                   |                  | 30,88                   | 0,23                   | 12                |                |
| 7       | Woman  | 66          | 10                  | Severe           | 27,22                   | 4,71                   | 29                |                |
|         |        |             | 8                   |                  | 13226,94                | 565,17                 | 16                | 25,6           |
|         |        |             | 9                   |                  | 15438,59                | 751,42                 | 21                |                |
|         |        |             | 11                  |                  | 21765,72                | 226,07                 | 1052              |                |
|         |        |             | 12                  |                  | 487,46                  | 51,59                  | 2311              |                |
|         |        |             | 14                  |                  | 64,69                   | 5,01                   | 18003             |                |
|         |        |             | 15                  |                  | 34,54                   | 2,58                   | 33439             |                |
|         |        |             | 18                  |                  | 2,18                    | 0,29                   | 59823             |                |
| 8       | Man    | 78          | 20                  | Moderate         | 0,099                   | 0,2                    | 1178127           |                |
|         |        |             | 7                   |                  | 489,02                  | 59,04                  | 46                | 22,4           |
|         |        |             | 9                   |                  | 203,57                  | 36,62                  | 5755              |                |
|         |        |             | 12                  |                  | 8,31                    | 2                      | 30262             |                |
|         |        |             | 16                  |                  | 0,099                   | 0,53                   | 108151            |                |
| 9       | Woman  | 94          | 20                  | Moderate         | 0,099                   | 0,54                   | 73148             |                |
|         |        |             | 7                   |                  | 70,15                   | 5,62                   | 69                | 16,8           |
|         |        |             | 8                   |                  | 84,88                   | 6,77                   | NA                |                |
|         |        |             | 11                  |                  | 645,41                  | 40,91                  | 43                |                |
|         |        |             | 16                  |                  | 19,62                   | 1,99                   | 615               |                |
|         |        |             | 18                  |                  | 1,79                    | 0,3                    | 1691              |                |
|         |        |             | 23                  |                  | 0,62                    | 0,27                   | 2913              |                |
|         |        |             | 25                  |                  | 0,099                   | 0,16                   | 1815              |                |

**Supplemental Figure S1:** Repartition of blood samples per patient per disease category.

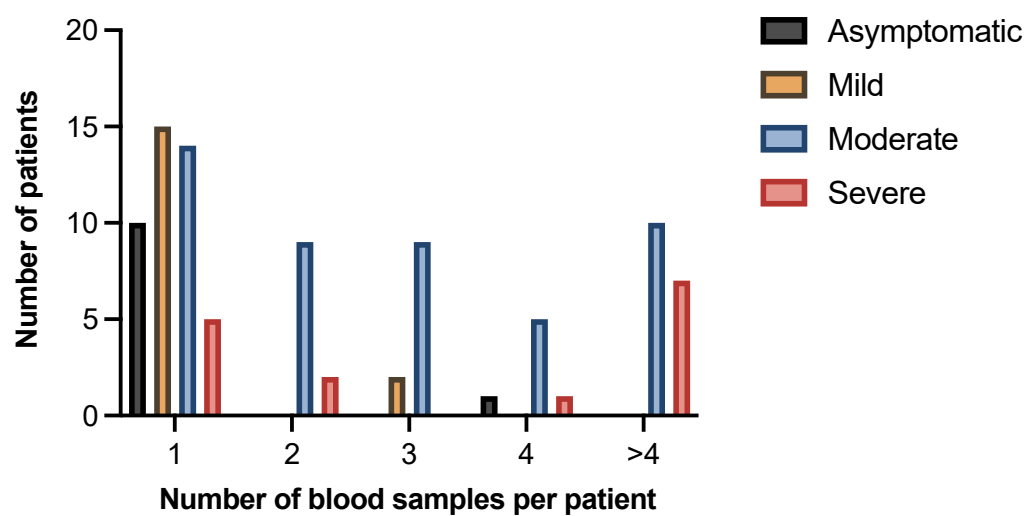

**Supplemental Figure S2: ROC curves for cut-off determination according to different samples inclusion settings.** Three different inclusion settings were used: a) earliest antigenemia value from symptom onset within the day 2 to day 14 window for a particular patient (in green), b) mean of all antigenemia values of samples collected within the day 2 to day 14 window for a particular patient (in blue) and c) the maximal antigenemia value obtained within the day 2 to day 14 window (in red). For all these analyses, 84 samples were included (n = 71 for non-severe patients and n = 13 for severe patients). These analyses were performed for the Simoa and the iFlash assays.

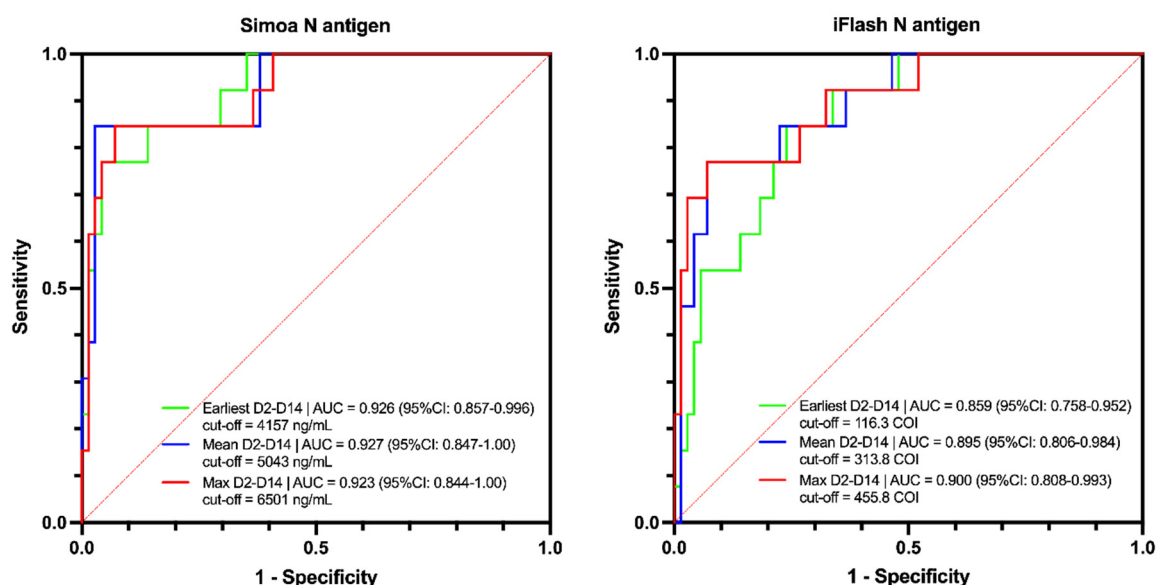

**Supplemental Figure S3: Correlation between the Simoa and the iFlash N antigen assays.**

The grey dotted lines represent the cut-off determined by the ROC curves and the black dotted line on the iFlash axis represent the cut-off of the manufacturer. NPA, negative percentage agreement; PPA, positive percentage agreement.

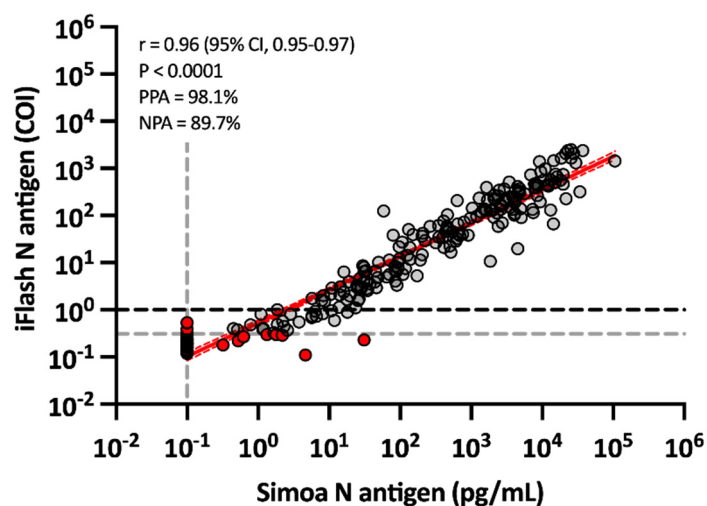

**Supplemental Figure S4: Kinetics of antigenemia and SARS-CoV-2 Spike IgG antibodies since the onset of symptoms in non-severe and severe patients determined according to the WHO clinical progression scale.(20)** The continuous orange line correspond to the severity cut-off of the Simoa assay and the green line to the iFlash assay, as found by ROC curves analyses. The purple dotted lines correspond to the positivity cut-off of the SARS-CoV-2 Spike IgG assay. The continuous red and blue lines correspond to antigen kinetics in severe and non-severe patients. The dotted red and blue lines correspond to the kinetics of SARS-CoV-2 Spike IgG in severe and non-severe patients. Only patients with symptoms and negative for IgG directed against the Spike protein at inclusion were included in this representation.

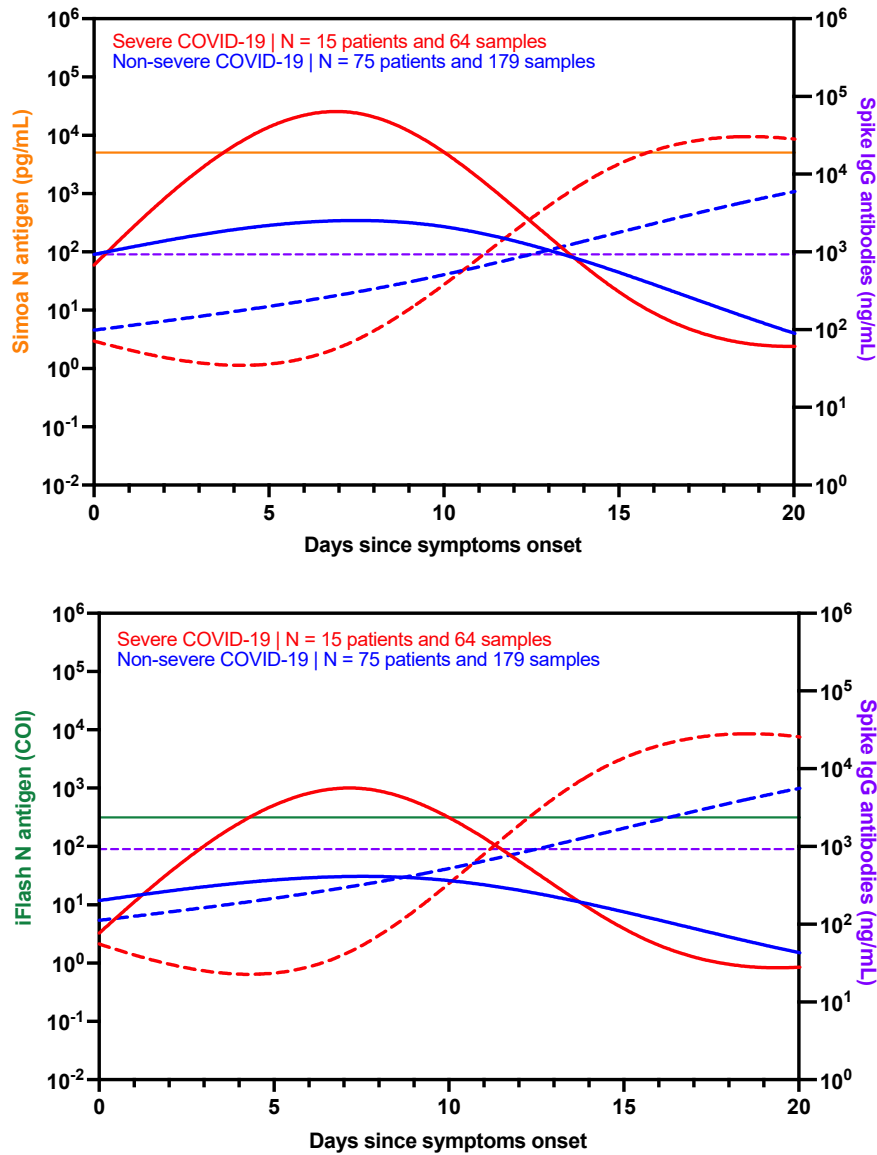

**Supplemental Figure S5:** SARS-CoV-2 Spike IgG results in serum in severe versus non-severe patients. The grey dotted lines on the Y-axis correspond to the positivity cut-off of the assay.

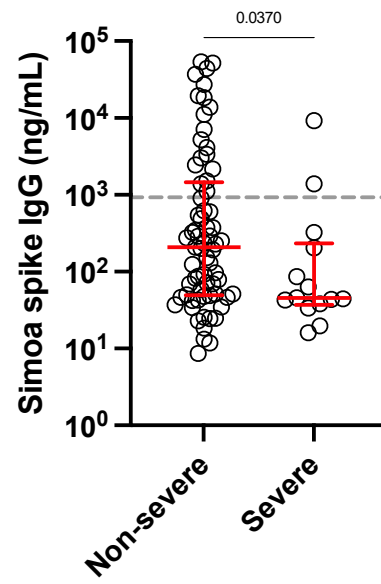

## STARD checklist:

| Section & Topic          | No         | Item                                                                                                                                                   | Reported on page # |
|--------------------------|------------|--------------------------------------------------------------------------------------------------------------------------------------------------------|--------------------|
| <b>TITLE OR ABSTRACT</b> |            |                                                                                                                                                        |                    |
|                          | <b>1</b>   | Identification as a study of diagnostic accuracy using at least one measure of accuracy (such as sensitivity, specificity, predictive values, or AUC)  | 2                  |
| <b>ABSTRACT</b>          |            |                                                                                                                                                        |                    |
|                          | <b>2</b>   | Structured summary of study design, methods, results, and conclusions (for specific guidance, see STARD for Abstracts)                                 | 2                  |
| <b>INTRODUCTION</b>      |            |                                                                                                                                                        |                    |
|                          | <b>3</b>   | Scientific and clinical background, including the intended use and clinical role of the index test                                                     | 3-4                |
|                          | <b>4</b>   | Study objectives and hypotheses                                                                                                                        | 4                  |
| <b>METHODS</b>           |            |                                                                                                                                                        |                    |
| <i>Study design</i>      | <b>5</b>   | Whether data collection was planned before the index test and reference standard were performed (prospective study) or after (retrospective study)     | 4-5                |
| <i>Participants</i>      | <b>6</b>   | Eligibility criteria                                                                                                                                   | 4                  |
|                          | <b>7</b>   | On what basis potentially eligible participants were identified (such as symptoms, results from previous tests, inclusion in registry)                 | 4-5                |
|                          | <b>8</b>   | Where and when potentially eligible participants were identified (setting, location and dates)                                                         | 4-5                |
|                          | <b>9</b>   | Whether participants formed a consecutive, random or convenience series                                                                                | 4-5                |
| <i>Test methods</i>      | <b>10a</b> | Index test, in sufficient detail to allow replication                                                                                                  | 6-7                |
|                          | <b>10b</b> | Reference standard, in sufficient detail to allow replication                                                                                          | 6-7                |
|                          | <b>11</b>  | Rationale for choosing the reference standard (if alternatives exist)                                                                                  | 3-4                |
|                          | <b>12a</b> | Definition of and rationale for test positivity cut-offs or result categories of the index test, distinguishing pre-specified from exploratory         | 8                  |
|                          | <b>12b</b> | Definition of and rationale for test positivity cut-offs or result categories of the reference standard, distinguishing pre-specified from exploratory | 8                  |
|                          | <b>13a</b> | Whether clinical information and reference standard results were available to the performers/readers of the index test                                 | 4-5                |
|                          | <b>13b</b> | Whether clinical information and index test results were available to the assessors of the reference standard                                          | 4-5                |



|                          |            |                                                                                                             |                             |
|--------------------------|------------|-------------------------------------------------------------------------------------------------------------|-----------------------------|
| <i>Analysis</i>          | <b>14</b>  | Methods for estimating or comparing measures of diagnostic accuracy                                         | 7-8                         |
|                          | <b>15</b>  | How indeterminate index test or reference standard results were handled                                     | 7-8                         |
|                          | <b>16</b>  | How missing data on the index test and reference standard were handled                                      | 7-8                         |
|                          | <b>17</b>  | Any analyses of variability in diagnostic accuracy, distinguishing pre-specified from exploratory           | 7-8                         |
|                          | <b>18</b>  | Intended sample size and how it was determined                                                              | /                           |
| <b>RESULTS</b>           |            |                                                                                                             |                             |
| <i>Participants</i>      | <b>19</b>  | Flow of participants, using a diagram                                                                       | 5 and Figure 1              |
|                          | <b>20</b>  | Baseline demographic and clinical characteristics of participants                                           | 5 and Supplemental Table 1  |
|                          | <b>21a</b> | Distribution of severity of disease in those with the target condition                                      | 5                           |
|                          | <b>21b</b> | Distribution of alternative diagnoses in those without the target condition                                 | 5                           |
|                          | <b>22</b>  | Time interval and any clinical interventions between index test and reference standard                      | 5 and Supplemental Figure 1 |
| <i>Test results</i>      | <b>23</b>  | Cross tabulation of the index test results (or their distribution) by the results of the reference standard | 8-10                        |
|                          | <b>24</b>  | Estimates of diagnostic accuracy and their precision (such as 95% confidence intervals)                     | 8-10                        |
|                          | <b>25</b>  | Any adverse events from performing the index test or the reference standard                                 | /                           |
| <b>DISCUSSION</b>        |            |                                                                                                             |                             |
|                          | <b>26</b>  | Study limitations, including sources of potential bias, statistical uncertainty, and generalisability       | 13-14                       |
|                          | <b>27</b>  | Implications for practice, including the intended use and clinical role of the index test                   | 13-14                       |
| <b>OTHER INFORMATION</b> |            |                                                                                                             |                             |
|                          | <b>28</b>  | Registration number and name of registry                                                                    | /                           |
|                          | <b>29</b>  | Where the full study protocol can be accessed                                                               | 5                           |
|                          | <b>30</b>  | Sources of funding and other support; role of funders                                                       | 15                          |
